# Supplementary material
Source: PubMed Central journal article supplement (PMC9293543)
Supplement: NIHMS1822090-supplement-Supplementary_Figures.pdf [file NIHMS1822090-supplement-Supplementary_Figures.pdf]

# Supplemental Figure 1

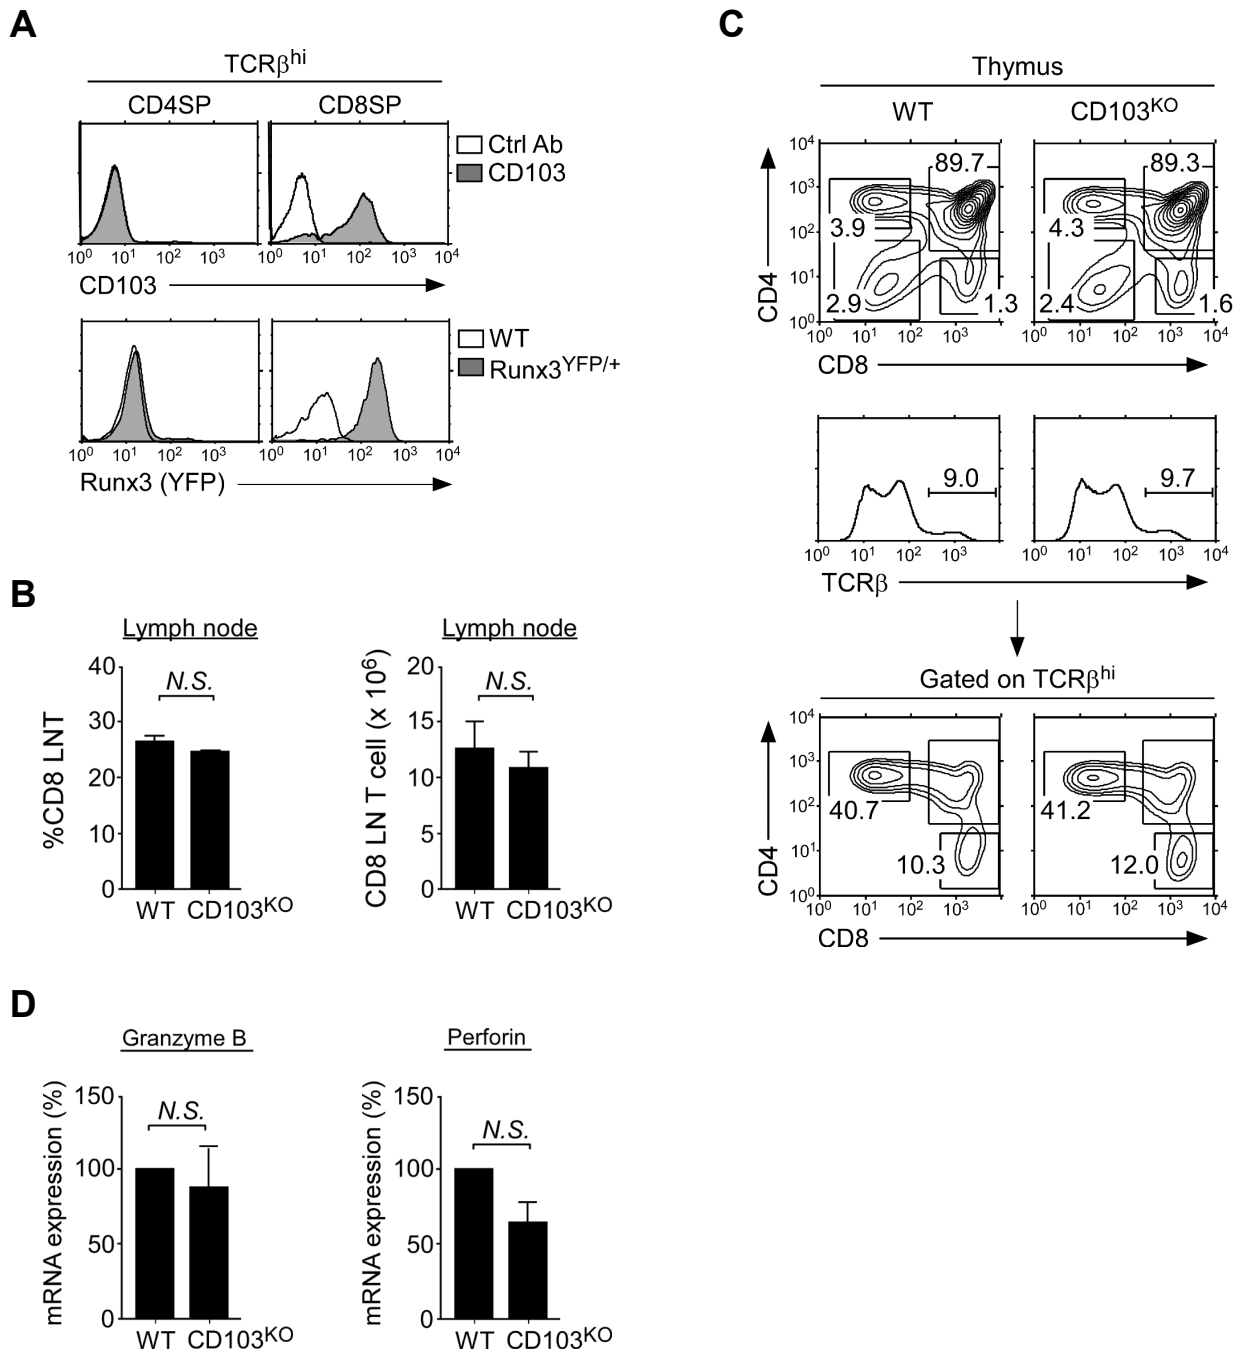

## Supplemental Figure 1. Runx3 and CD103 expression on CD8 T cells.

(A) Runx3<sup>YFP/+</sup> reporter mice were used to determine the expression of CD103 and Runx3 in CD4SP and CD8SP thymocytes. Data are from 5 independent experiments.

(B) Frequency and cell number of TCRβ<sup>+</sup> CD8 T cells in LN of WT and CD103<sup>KO</sup> mice. Data are a summary of 8 experiments.

(C) Thymocyte profiles of WT and CD103<sup>KO</sup> mice. Representative of 8 independent experiments.

(D) Quantitative RT-PCR analysis of Perforin and Granzyme B mRNA in freshly purified WT and CD103<sup>KO</sup> CD8 LN T cells (relative to β-actin). Data are from 2 independent experiments with a total of 4 WT and CD103<sup>KO</sup> mice.

## Supplemental Figure 2

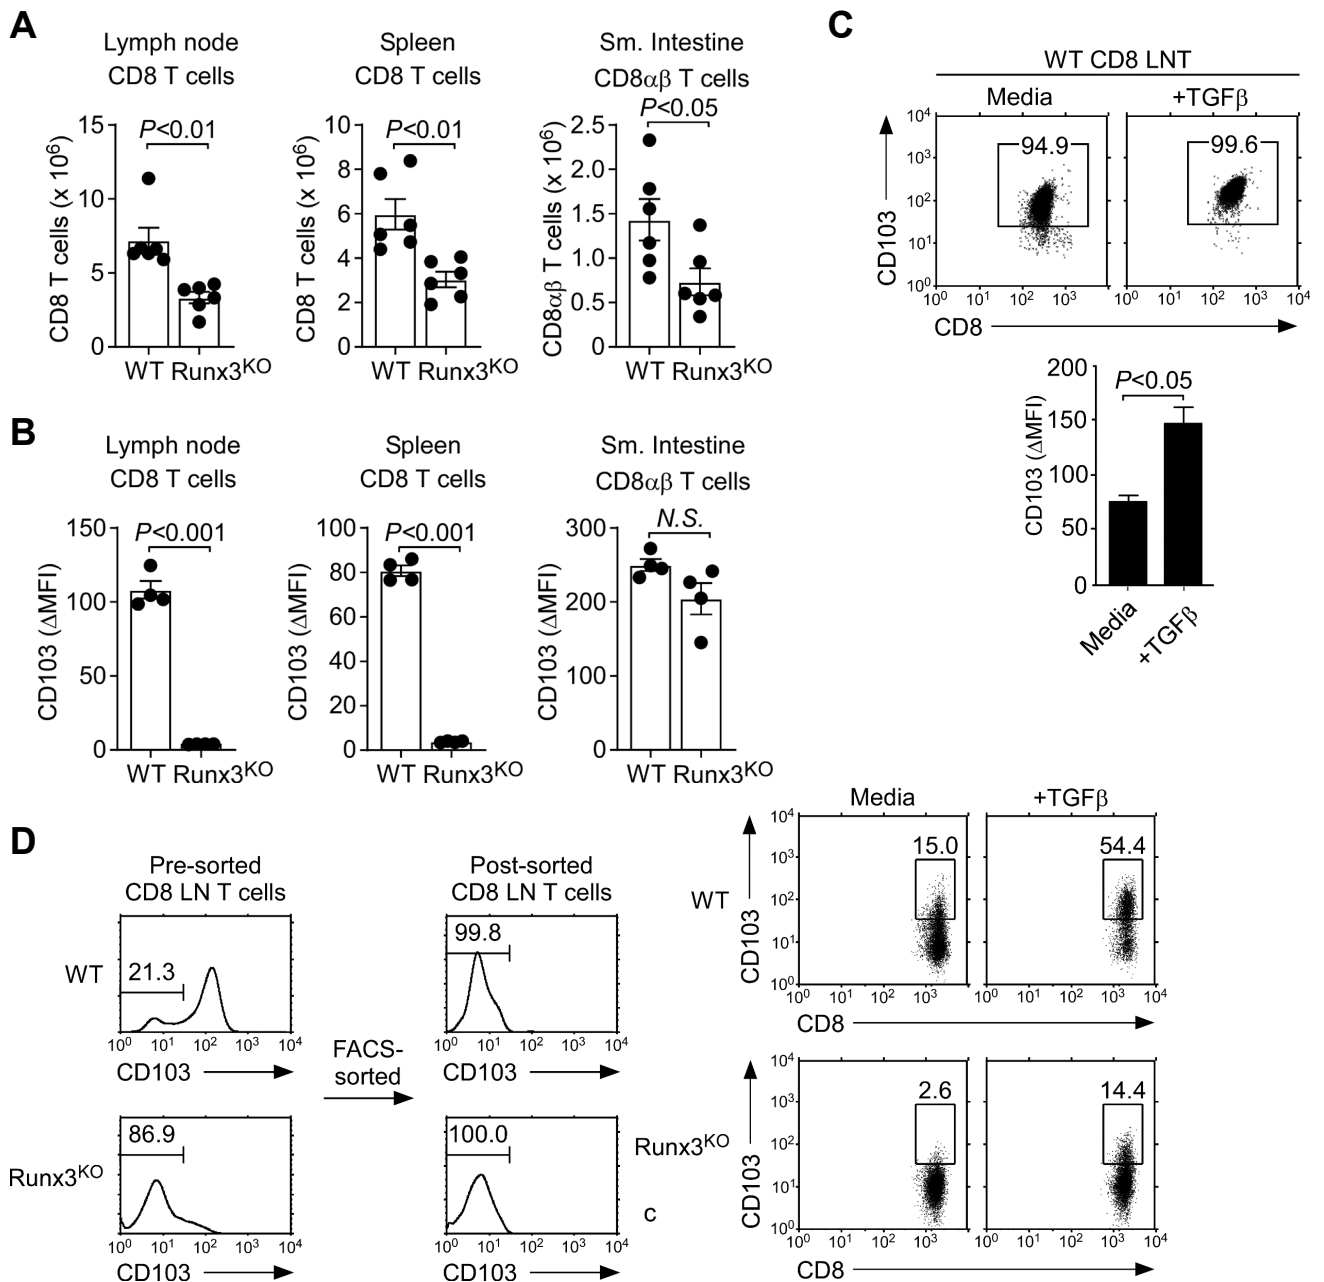

### Supplemental Figure 2. T cell differentiation in the absence of Runx3

(A) CD8 T cell numbers in the LN, spleen and small intestine IEL of WT and Runx3<sup>KO</sup> mice. Data are representative of 3 independent experiments with a total of 6 WT and 6 Runx3<sup>KO</sup> mice.

(B) Quantification of CD103 expression on WT and Runx3<sup>KO</sup> CD8 T cells.  $\Delta$ MFI of CD103 expression was assessed on CD8 T cells of LN, spleen and small intestine IEL of WT and Runx3<sup>KO</sup> mice. Data are representative of 2 independent experiments with a total of 4 WT and 4 Runx3<sup>KO</sup> mice.

(C) CD103 surface expression on WT CD8 T cells after 4 days of in vitro stimulation with TGF $\beta$ . Mean fluorescence intensities (MFI) of CD103 expression on the gated CD103<sup>+</sup> CD8 LN T cells following stimulation. Data are from 2 independent experiments with a total of 6 mice.

(D) Histograms (left) show the purity check for CD103-negative CD8 LN T cells before and after FACS-sorting. Dot plots show CD103 expression on FACS-sorted CD103-negative WT and Runx3<sup>KO</sup> CD8 LN T cells after 4 days of in vitro stimulation with TGF $\beta$ . Data are representative of 3 independent experiments.

# Supplemental Figure 3

**A**

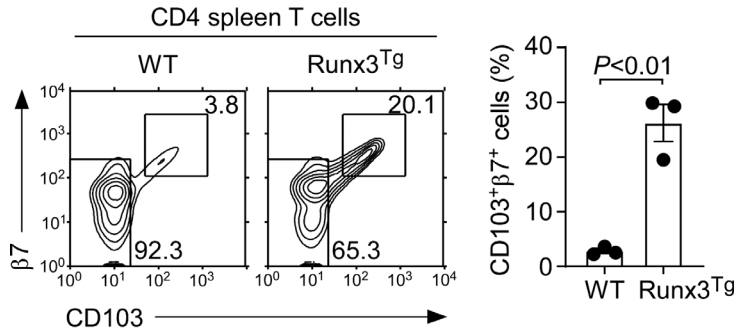

**B**

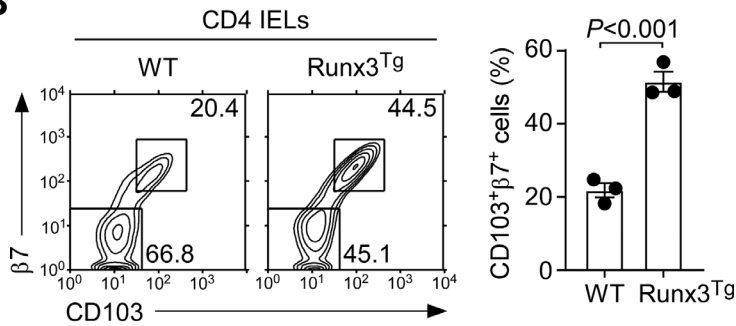

**C**

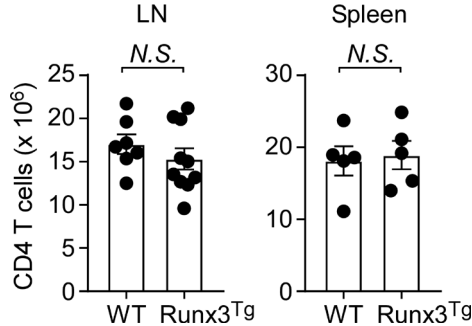

## Supplemental Figure 3. Frequencies of CD103<sup>+</sup> $\beta 7$ <sup>+</sup> CD4 T cells in the spleen and IELs of WT and Runx3<sup>Tg</sup> mice.

Coexpression of CD103 and  $\beta 7$  in CD4 T cells from the spleen (A) or small intestine IEL (B) of WT and Runx3<sup>Tg</sup> mice. CD4 T cells were assessed for CD103 and  $\beta 7$ , and the frequency of CD103,  $\beta 7$  coexpressing cells were determined. Contour plots are representative, and the bar graphs show the summary of 2 independent experiments with a total of 3 WT and 3 Runx3<sup>Tg</sup> mice.

(C) CD4 T cell numbers in WT and Runx3<sup>Tg</sup> mice. LN CD4 T cell results are from 7 independent experiments with a total of 7 WT and 10 Runx3<sup>Tg</sup> mice. Spleen CD4 T cell results are from 5 independent experiments with a total of 5 WT and 5 Runx3<sup>Tg</sup> mice.

## Supplemental Figure 4

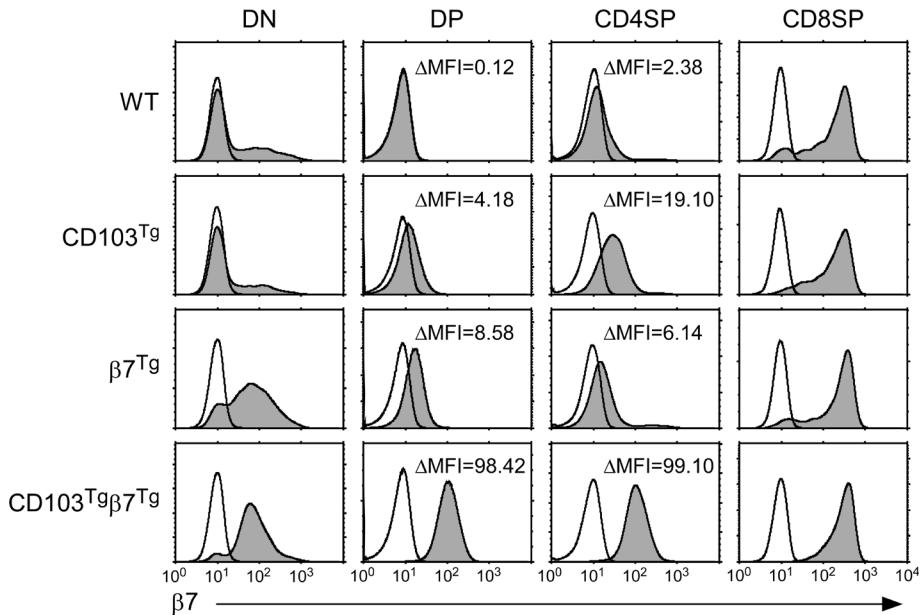

### Supplemental Figure 4. Generation of CD103<sup>+</sup> CD4 T cells by transgenic expression of CD103 and $\beta 7$

Surface  $\beta 7$  expression on DN, DP, and mature CD4SP and CD8SP thymocytes of WT, CD103<sup>Tg</sup>,  $\beta 7^{\text{Tg}}$ , and CD103<sup>Tg</sup> $\beta 7^{\text{Tg}}$  mice. Shaded histograms show anti- $\beta 7$  staining; open histograms indicate control antibody staining.  $\Delta$ Mean Fluorescence Intensity ( $\Delta\text{MFI}$ ) of  $\beta 7$  expression was determined by subtracting the control antibody MFI from CD103 MFI. The results are representative of 7 independent experiments with a total of 7 WT, 7 CD103<sup>Tg</sup>, 7  $\beta 7^{\text{Tg}}$ , and 7 CD103<sup>Tg</sup> $\beta 7^{\text{Tg}}$  mice.

# Supplemental Figure 5

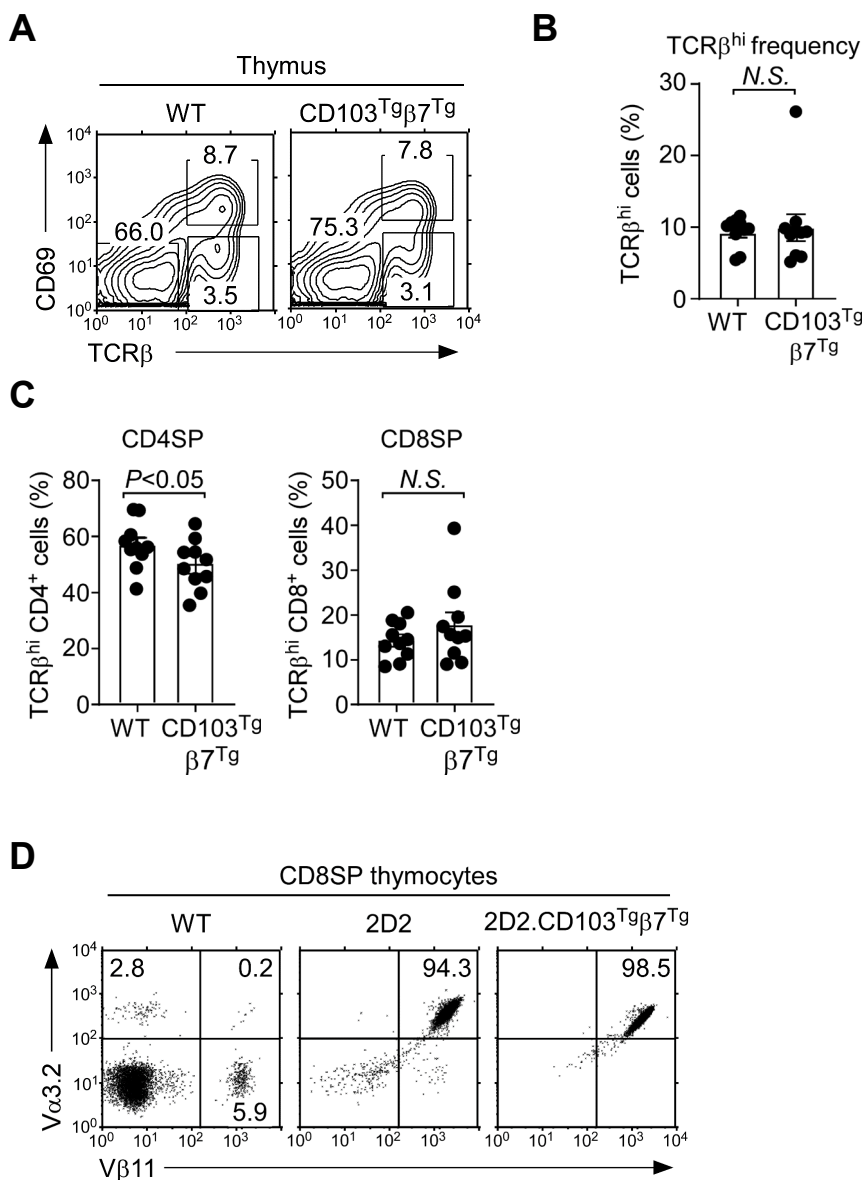

## Supplemental Figure 5. Thymocyte differentiation in CD103<sup>Tg</sup>β7<sup>Tg</sup> mice

(A) CD69 versus TCRβ thymocyte profiles of WT and CD103<sup>Tg</sup>β7<sup>Tg</sup> mice. Data are representative of 2 independent experiments.

(B) Bar graphs show the frequency of TCRβ<sup>hi</sup> thymocytes in WT and CD103<sup>Tg</sup>β7<sup>Tg</sup> mice. Results show the summary of 8 independent experiment with a total of 10 WT and 10 CD103<sup>Tg</sup>β7<sup>Tg</sup> mice.

(C) Bar graphs show the frequency of TCRβ<sup>hi</sup> CD4SP and CD8SP cells among WT and CD103<sup>Tg</sup>β7<sup>Tg</sup> thymocytes. The results show the summary of 8 independent experiments with a total of 10 WT and 10 CD103<sup>Tg</sup>β7<sup>Tg</sup> mice.

(D) Clonotypic TCR expression in CD8SP thymocytes of 2D2.CD103<sup>Tg</sup>β7<sup>Tg</sup> mice. Clonotypic TCR Vβ11 and Vα3.2 expression was assessed on CD8SP cells of WT C57BL/6, 2D2, and 2D2.CD103<sup>Tg</sup>β7<sup>Tg</sup> mice.

# Supplemental Figure 6

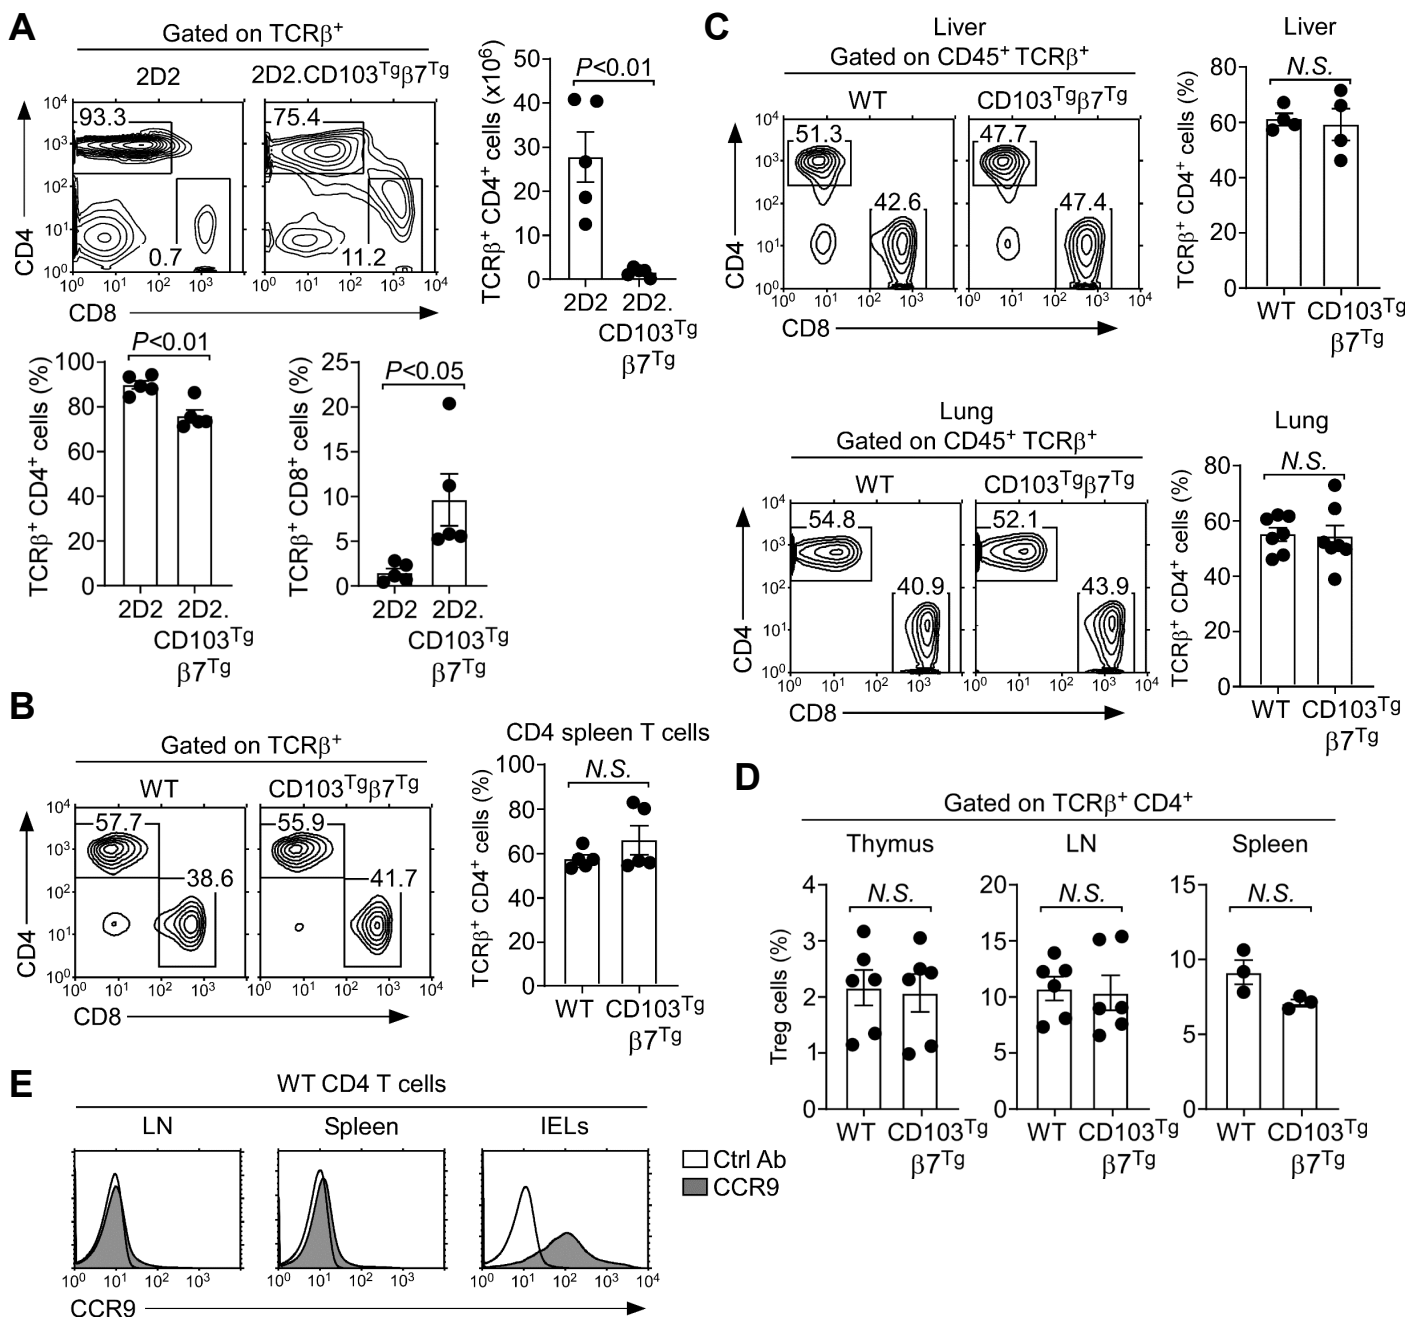

## Supplemental Figure 6. CD4 T cells in peripheral organs of CD103 $T_g\beta_7T_g$ mice.

(A) CD4 versus CD8 profiles of 2D2 and 2D2.CD103 $T_g\beta_7T_g$  thymocytes. Contour plots are representative and bar graph shows summary of 4 independent experiments with total 5 2D2 and 5 2D2.CD103 $T_g\beta_7T_g$  mice.

(B) CD4 versus CD8 profiles of splenic T cells of WT and CD103 $T_g\beta_7T_g$  mice. Contour plots are representative and bar graph shows summary of 3 independent experiments with total 5 WT and 5 CD103 $T_g\beta_7T_g$  mice.

(C) Frequency of CD4 T cells in the liver and lung of WT and CD103 $T_g\beta_7T_g$  mice. Data are representative of 3 independent experiments for the liver (top) with 4 WT and 4 CD103 $T_g\beta_7T_g$  mice, and 6 independent experiments for the lung (bottom) with total 7 WT and 7 CD103 $T_g\beta_7T_g$  mice.

(D) Frequency of CD25 $^+$ Foxp3 $^+$  CD4 Treg cells in the thymus, LN and spleen of WT and CD103 $T_g\beta_7T_g$  mice. Data show the summary of at least 3 independent experiments.

(E) CCR9 expression on CD4 T cells from LN, spleen and IEL of WT mice.
